# Supplementary material
Source: publisher figshare collection journal article supplement (https://gsapubs.figshare.com/ndownloader/files/23315303)
Supplement: Supplementary file 1 [file 23315303]

## Sheet: Reference materials
Appendix 2 - Analyses of reference materials used in the calibration of the LA-ICP-MS and in-house reference materials used to monitor the data quality.
	Element	Ag	As	Au	Bi	Cd	Co	Cu (%)	In	Ir	Mo	Ni	Os	Pb	Pd	Pt	Re	Rh	Ru	Sb	Se	Sn	Te	Tl	Zn
	Isotope	109Ag	75As	197Au	209Bi	111Cd	59Co	65Cu	115In	193Ir	95Mo	61Ni	189Os	208Pb	108Pd	195Pt	185Re	103Rh	101Ru	121Sb	82Se	118Sn	130Te	205Tl	66Zn
	Detection limit	0.006761	0.0652876	0.00783512	0.00421786	0.0367068	0.00713907	0.186536	0.00503312	0.00387904	0.0196582	0.643281	0.0170919	0.00714828	0.00817003	0.012509	0.010146	0.00244357	0.0146762	0.0474758	1.8244	0.0496255	0.256631	0.0040408	0.173877
	Reference materials used for calibration	GSE-1g	GSE-1g	Po-727	GSE-1g	GSE-1g	GSE-1g	MASS-1	GSE-1g	Po-727	GSE-1g	GSE-1g	Po-727	GSE-1g	Po-727	Po-727	GSE-1g	Po-727	Po-727	GSE-1g	MASS-1	GSE-1g	MASS-1	MASS-1	MASS-1
	Working value	200	260	45.8	320	160	380	13.4	370	48	390	440	46.7	378	43.4	35.5	78.9	41.6	36.5	450	51	280	15	50	210000
	Stdev	20	90	2.4	30	50	20	0.05	60	1.2	30	30	2.6	12	0.3	0.8	n.d.	0.3	0.3	110	4	50	n.d	n.d.	500
	Values obtained for reference materials used as monitors
JB-MSS-5	Working value	53	79	35.9	76.1	0.13	0.28	0.021		40.21	0.23	10487	42.58	71.5	65.2	39.9	20.7	61.4	21.68	61.3	47.27	0.34	44		<10
	Stdev	4.9	11	4.8	2.9	0.04	0.02	0.007		0.53	0.02	n.d.	0.93	4.5	5.1	1	n.d.	7.2	2.31	7.3	13.39	0.03	3		n.d.
	This study (average)	58.81	57.78	37.57	84.19	0.20	0.14	0.023		39.75	0.52	10741.81	44.38	77.9	63.65	38.99	21.46	59.97	19.96	75.32	58.41	0.87	39.36		17.02
	Stdev (n= 22)	3.63	5.05	3.71	3.86	0.10	0.09	0.001		2.88	0.06	359.57	3.85	5.39	4.75	2.90	1.78	4.43	1.79	7.68	4.36	0.32	2.67		18.31
	RSD (%)	6.18	8.75	9.88	4.58	51.21	66.39	34.14		7.25	10.88	3.35	8.67	6.92	7.47	7.45	8.29	7.39	8.95	9.69	7.46	37.14	6.78		107.55
GSE-1g	Working value			7				0.038								30					20			2	460
	Stdev			n.d.				0.004								n.d.					16			n.d.	10
	This study (average)			8.26				0.037								21.21					45.71			1.39	398.65
	Stdev (n= 13)			0.67				0.001								3.45					6.7			0.06	29.11
	RSD (%)			8.07				2.62								16.25					14.66			4.54	7.3
MASS-1	Working value	50	65	47	60	60	60		50	46.2	59	97		68		51.9				60		59	15	50	210000
	Stdev	5	3	n.d.	n.d.	7	10		n.d	n.d	9	15		7		n.d.				9		6	n.d	n.d.	5000
	This study (average)	67.06	56.84	54.60	68.96	52.84	74.5		62.01	58.49	63.95	108.28		79.02		58.96				72.91		58.81	15.01	50	210563.6
	Stdev (n= 22)	2.24	2.67	5.18	1.57	3.62	2.47		1.67	8.06	1.56	22.68		2.80		2.50				4.04		2.08	0.30	0.76	5020
	RSD (%)	3.33	4.70	9.49	2.28	6.84	3.31		2.69	13.77	2.43	20.94		3.54		4.26				5.55		3.54	2.0	1.52	2.38

## Sheet: Kharaelakh Contact Pn
Appendix DR2 - Complete data set of LA-ICP-MS analyses of contact-pentlandite from the Kharaelakh intrusion obtained in this study.
Sample	Ore type	Intrusion	Mine	Co	Cu	Zn	As	Se	Mo	Ru	Rh	Pd	Ag	Cd	In	Sn	Sb	Te	Re	Os	Ir	Pt	Au	Tl	Pb	Bi
Isotope				59Co	65Cu	66Zn	75As	82Se	95Mo	101Ru	103Rh	108Pd	109Ag	111Cd	115In	118Sn	121Sb	130Te	185Re	189Os	193Ir	195Pt	197Au	205Tl	208Pb	209Bi
Limit of detection				0.00713907	0.186536	0.1738	0.06528	1.8244	0.01965	0.0146762	0.00244	0.00817003	0.006761	0.0367	0.005	0.0496255	0.0474	0.2566	0.01014	0.01709	0.00387	0.0125	0.00783	0.00404	0.00714	0.00421
90OC13	Cu-rich massive sulfides	Kharaelakh	Oktyabr'sky	19373.2	13.024	0.19	0.172568	52.4216	4.10256	4.82139	3.86449	280.929	3.42857	0.041	0.005	0.09768	0.06	1.20798	1.23525	1.21774	1.47497	0.017908	0.00783	0.237688	25.7224	0.45584
90OMZS1-3	Cu-rich massive sulfides	Kharaelakh	Oktyabr'sky	10959.7	11.7216	0.188848	0.101262	52.617	0.677248	0.753031	1.13925	245.567	7.91208	0.0367	0.005	0.0514448	0.0474	3.06064	0.428164	0.328856	0.2442	0.0306064	0.00783	0.0166056	18.5592	0.4884
90OMZS1-3	Cu-rich massive sulfides	Kharaelakh	Oktyabr'sky	10445.2	7.22832	0.1738	0.117216	55.0264	1.52706	2.18095	3.00828	244.981	9.1168	0.0367	0.005	0.0496255	0.0474	0.713064	1.35728	1.0875	0.856328	0.0175824	0.00783	0.0413512	6.25152	0.0970288
90OMZS1-3	Cu-rich massive sulfides	Kharaelakh	Oktyabr'sky	11200.6	9.40984	0.208384	0.110704	45.9096	1.1396	1.20568	4.30743	261.392	8.23768	0.0367	0.005	0.0496255	0.0474	1.11681	0.571599	0.27676	0.34188	0.0125	0.00783	0.115262	15.2055	0.0608872
90OMZS1-3	Cu-rich massive sulfides	Kharaelakh	Oktyabr'sky	11050.9	22.1408	0.319088	0.250712	42.3606	0.34188	1.41551	5.7299	285.418	14.7497	0.052096	0.0142365	0.296296	0.0474	0.787952	0.509515	0.45584	0.433048	0.0125	0.00783	0.22792	8.72608	0.0413512
90OMZS1-3	Cu-rich massive sulfides	Kharaelakh	Oktyabr'sky	11233.2	28.6528	1.75824	1.08151	41.3186	0.01965	0.0146762	0.00244	271.09	36.1416	0.136752	0.024961	0.0496255	0.0474	3.7737	0.01014	0.01709	0.00387	0.0745624	0.00783	0.0866096	28.9784	0.507936
90OMZS1-3	Cu-rich massive sulfides	Kharaelakh	Oktyabr'sky	11070.4	59.5848	1.17216	1.3024	40.0488	0.078144	0.016711	0.0413753	266.661	23.4432	0.0814	0.0854374	45.9096	0.0474	4.68864	0.01014	0.0257224	0.087912	0.58608	0.58608	0.266992	80.4232	0.354904
90OMZS1-3	Cu-rich massive sulfides	Kharaelakh	Oktyabr'sky	11168.1	48.84	0.71632	1.08151	37.444	1.01587	1.01984	0.0777832	231.496	18.2336	0.09768	0.005	39.072	0.0474	18.5592	1.45576	1.72568	0.345136	3.256	9.1168	0.112006	16.6056	0.1936
90OMZS1-3	Cu-rich massive sulfides	Kharaelakh	Oktyabr'sky	11265.8	24.7456	0.361954	4.03744	41.514	0.11396	0.0146762	0.00244	256.026	14.4241	0.058608	0.0272592	3.19088	0.0474	5.30728	0.01014	0.01709	0.120472	0.175824	0.035816	0.159544	9.24704	0.4008
90OMZS1-3	Cu-rich massive sulfides	Kharaelakh	Oktyabr'sky	10809.9	93.4472	1.49776	1.08151	34.188	0.01965	0.0146762	0.00244	236.432	16.7358	0.120472	0.005	5.8608	0.0474	2.34758	0.01014	0.01709	0.00387	0.0125	0.00783	6.70736	35.4904	0.0436304
90OMZS2-2	Transitional massive sulfides	Kharaelakh	Oktyabr'sky	11116	7.9772	0.5698	0.319088	46.5608	0.377696	0.423382	0.924461	311.649	2.10989	0.22792	0.005	0.084656	0.0474	1.0061	0.141294	0.0420024	0.078144	0.0576312	0.00783	0.00404	5.73056	0.0540496
90OMZS2-2	Transitional massive sulfides	Kharaelakh	Oktyabr'sky	12047.2	22.792	0.784696	0.208384	58.9336	2.14896	1.77383	0.84915	223.543	4.07	0.0367	0.005	0.221408	0.0474	0.410256	0.374644	0.198616	0.273504	0.083028	0.019536	0.117216	12.5682	0.11396
90OMZS2-2	Transitional massive sulfides	Kharaelakh	Oktyabr'sky	11461.1	9.6052	0.582824	0.133496	51.7704	0.94424	0.565181	0.105853	222.542	2.64062	0.0367	0.005	0.100936	0.0474	0.2566	0.303996	0.087912	0.091168	0.055352	0.166056	0.221408	9.24704	0.0517704
90OMZS2-2	Transitional massive sulfides	Kharaelakh	Oktyabr'sky	12177.4	5.92592	0.416768	0.26048	53.724	0.628408	0.406837	1.24036	209.479	2.61131	0.0367	0.005	0.0496255	0.0474	0.706552	0.190533	0.061864	0.119821	0.0125	0.00783	0.00404	6.31664	0.0335368
																			0
																			0.812179

## Sheet: Kharaelakh Granular Pn
Appendix 2 - Complete data set of LA-ICP-MS analyses of granular pentlandite from the Kharaelakh intrusion obtained in this study.
Sample	Ore type	Intrusion	Mine	Co	Cu	Zn	As	Se	Mo	Ru	Rh	Pd	Ag	Cd	In	Sn	Sb	Te	Re	Os	Ir	Pt	Au	Tl	Pb	Bi
Isotope				59Co	65Cu	66Zn	75As	82Se	95Mo	101Ru	103Rh	108Pd	109Ag	111Cd	115In	118Sn	121Sb	130Te	185Re	189Os	193Ir	195Pt	197Au	205Tl	208Pb	209Bi
Limit of detection				0.00713907	0.186536	0.1738	0.06528	1.8244	0.01965	0.0146762	0.00244	0.00817003	0.006761	0.0367	0.005	0.0496255	0.0474	0.2566	0.01014	0.01709	0.00387	0.0125	0.00783	0.00404	0.00714	0.00421
90OMZS2-2	Transitional massive sulfides	Kharaelakh	Oktyabr'sky	11363.4	17.908	1.38706	0.507936	46.8864	0.0970288	0.177391	0.0152682	111.353	5.17704	0.078144	0.005	0.218152	0.0474	1.69963	0.01014	0.01709	0.0143264	0.10875	0.00783	0.174522	42.328	0.625152
90OMZS2-2	Transitional massive sulfides	Kharaelakh	Oktyabr'sky	11265.8	8.14	0.29304	0.266992	41.3512	2.05128	0.204619	0.0342481	105.168	2.64062	0.0367	0.005	0.0496255	0.0474	0.345136	0.59943	0.104192	0.00387	0.0322344	0.00783	0.1628	7.13064	0.0091168
90OMZS2-2	Transitional massive sulfides	Kharaelakh	Oktyabr'sky	11330.9	6.21896	0.35816	0.159544	45.584	0.0196582	0.163797	0.00861118	108.099	2.18152	0.0367	0.005	0.0496255	0.058608	1.47171	0.01014	0.01709	0.00387	0.0621896	0.00783	0.0361416	2.75132	0.0400488
NR-13	Transitional massive sulfides	Kharaelakh	Taymyrsky	11721.6	112006	1693.12	0.133496	30.9971	0.0280016	0.241056	0.00244	41.2906	30.932	11.4937	0.926659	0.361416	0.0474	0.827024	0.01014	0.01709	0.00387	2.70248	0.00783	1.9015	41.3838	0.288156
NR-13	Transitional massive sulfides	Kharaelakh	Taymyrsky	11461.1	8.7912	0.68376	0.136752	26.9271	0.345136	0.295759	0.579238	41.7413	11.2332	0.0367	0.005	0.0496255	0.0474	0.560032	0.173406	0.0433048	0.0462352	1.52706	0.00783	0.0315832	15.3683	0.238665
NR-13	Transitional massive sulfides	Kharaelakh	Taymyrsky	13577.5	8986.56	371.184	0.146194	27.1876	0.2442	0.257424	0.321074	50.9731	14.3915	2.40944	0.138976	0.286528	0.0474	1.16239	0.0886299	0.01709	0.0273504	3.52299	0.00783	0.507936	46.2352	0.393976
NR-13	Transitional massive sulfides	Kharaelakh	Taymyrsky	5857.54	34188	201.872	0.06528	25.0712	0.319088	0.244888	0.00244	30.8598	13.1217	2.14896	0.1522	0.231176	0.0474	0.713064	0.492389	0.172568	0.106797	1.45869	0.00783	0.136101	27.2853	0.427513
NR-13	Transitional massive sulfides	Kharaelakh	Taymyrsky	13349.6	4.20024	0.250712	0.104192	25.4294	0.214896	0.244082	0.660826	51.7693	9.86568	0.0367	0.005	0.0496255	0.0474	0.50468	0.15628	0.01709	0.053724	3.0932	0.02442	0.140008	16.6056	0.18429
NR-13	Transitional massive sulfides	Kharaelakh	Taymyrsky	15661.4	110.704	1064.71	0.140008	28.0342	0.0196582	0.237963	0.00244	55.1879	4.26536	4.884	0.168738	0.159544	0.0474	0.92796	0.01014	0.01709	0.00387	2.57875	0.0188848	0.104192	22.6943	0.272527
NR-14	Transitional massive sulfides	Kharaelakh	Taymyrsky	16377.7	537.24	478.632	0.21164	39.365	0.78144	0.0535589	0.00244	63.3924	2.18152	2.96296	0.198346	0.074888	0.084656	0.43956	0.642246	0.071632	0.00387	1.73545	0.00783	0.257224	15.987	0.214245
NR-14	Transitional massive sulfides	Kharaelakh	Taymyrsky	21652.4	3.5816	0.1738	0.156288	41.6442	0.315832	0.289069	0.507823	69.19	1.13634	0.0367	0.005	0.110704	0.0474	0.68376	0.175547	0.06512	0.074888	3.52299	0.00783	0.0087912	0.729344	0.0286528
NR-14	Transitional massive sulfides	Kharaelakh	Taymyrsky	19829	328.856	30.932	0.3256	38.9418	0.345136	0.369174	0.287818	108.093	3.26251	0.188848	0.0252457	0.403744	0.17908	0.967032	0.113463	0.0361416	0.0449328	6.77248	0.00783	0.118518	8.75864	0.61864
NR-14	Transitional massive sulfides	Kharaelakh	Taymyrsky	15987	4363.04	117.216	0.156288	41.8396	0.27676	0.376119	0.78942	53.5013	4.59096	0.814	0.100876	0.0496255	0.0474	0.2566	0.141294	0.055352	0.0524216	0.901912	0.0420024	0.240944	16.2149	0.213268
NR-14	Transitional massive sulfides	Kharaelakh	Taymyrsky	17028.9	41.6768	0.61864	0.17908	39.3976	0.306064	0.308503	0.620206	59.1287	1.63777	0.0367	0.005	0.0496255	0.0474	0.621896	0.117745	0.0498168	0.053724	0.709808	0.0332112	0.04884	5.76312	0.0950752
NR-18	Cu-rich massive sulfides	Kharaelakh	Oktyabr'sky	5333.33	2376.88	23.7688	0.06528	71.3064	0.0196582	0.422798	0.00244	270.224	2.73504	0.706552	0.640283	0.319088	0.0474	8.36792	0.01014	0.01709	0.00387	0.149776	0.00783	2.63736	21.4896	1.75824
NR-18	Cu-rich massive sulfides	Kharaelakh	Oktyabr'sky	5525.43	60.8872	3.7444	0.06528	72.9344	0.0196582	0.36021	0.00244	295.965	1.19495	0.172568	0.113397	0.156288	0.0474	8.49816	0.01014	0.01709	0.00387	0.188848	0.0166056	1.2503	7.84696	1.1917
NR-18	Cu-rich massive sulfides	Kharaelakh	Oktyabr'sky	7098.08	81.4	0.984	0.06528	65.7712	0.0196582	0.343508	0.00244	386.808	0.615384	0.140008	0.0153709	0.071632	0.0474	8.82376	0.01014	0.01709	0.00387	0.0125	0.00783	0.52096	3.7444	0.0446072
NR-18	Cu-rich massive sulfides	Kharaelakh	Oktyabr'sky	6512	13.3496	390.72	0.06528	72.9344	0.042328	0.16684	0.055119	2682.94	0.810744	0.0367	0.005	0.0496255	0.0474	5.89336	0.01014	0.01709	0.00387	0.250712	0.00783	0.605616	0.45584	0.104192
NR-17	Cu-rich massive sulfides	Kharaelakh	Oktyabr'sky	9995.92	2.9304	0.517704	0.397232	77.4928	0.02	0.198281	0.00679977	521.936	1.99267	0.0367	0.005	0.0814	0.0474	8.23768	0.01014	0.01709	0.00387	0.221408	0.104192	0.485144	12.4705	0.100936
NR-17	Cu-rich massive sulfides	Kharaelakh	Oktyabr'sky	10207.6	5.17704	0.481888	0.253968	82.3768	0.0247456	0.137785	0.00244	393.974	2.50712	0.061864	0.00853202	0.524216	0.0474	2.67969	0.01014	0.01709	0.00387	0.0125	0.410256	1.40334	70.004	0.11917
NR-17	Cu-rich massive sulfides	Kharaelakh	Oktyabr'sky	9777.77	250.712	0.931216	0.234432	81.7256	0.02	0.0953473	0.00244	391.044	56.98	0.04884	0.0340565	0.126984	0.0474	8.75864	0.01014	0.01709	0.00387	0.136752	0.703296	0.290761	7.4888	0.0612128
NR-17	Cu-rich massive sulfides	Kharaelakh	Oktyabr'sky	10718.8	18.8848	0.364672	0.459096	89.54	0.02	0.132531	0.00244	369.556	4.20024	0.0367	0.0210038	0.315832	0.0474	4.3956	0.556613	0.01709	0.00387	0.462352	0.892144	1.6573	99.9592	0.201872
NR-17	Cu-rich massive sulfides	Kharaelakh	Oktyabr'sky	10777.4	2.89784	0.608872	0.159544	82.7024	0.02	0.141561	0.0933542	627.431	4.7212	0.0367	0.005	0.0496255	0.0474	5.95848	0.01014	0.01709	0.00387	0.0436304	1.82336	0.726088	32.8856	0.0459096
NR-17	Cu-rich massive sulfides	Kharaelakh	Oktyabr'sky	10341.1	1.36752	0.299552	0.240944	89.54	0.02	0.096003	0.00244	502.075	3.84534	0.0367	0.005	0.0496255	0.0474	2.56247	0.01014	0.01709	0.00387	0.106146	0.61864	0.774928	31.2576	0.0517704
NR-17	Cu-rich massive sulfides	Kharaelakh	Oktyabr'sky	9842.89	31.5832	1.26984	0.201872	91.8192	0.0214896	0.115102	0.0129631	502.722	4.46072	0.13024	0.0212083	0.078144	0.0474	6.05616	0.01014	0.01709	0.00387	0.123728	0.84656	1.37403	19.8942	0.047212
NR-17	Cu-rich massive sulfides	Kharaelakh	Oktyabr'sky	9689.86	1.17216	0.426536	0.19536	88.5632	0.02	0.197433	0.0843001	710.459	2.9304	0.0367	0.005	2.2792	0.071632	3.16158	0.01014	0.01709	0.00387	0.0351648	0.501424	0.110053	1.628	0.0315832
90OMZ67-5-1	Cu-rich massive sulfides	Kharaelakh	Oktyabr'sky	9442.4	657.712	4.07	0.58608	113.96	0.42328	0.0773338	0.0381871	227.915	22.792	0.149776	0.005	113.96	0.068376	16.3451	0.01014	0.01709	0.00387	0.0125	0.0351648	8.20512	3256	0.0641432
90OMZ67-5-1	Cu-rich massive sulfides	Kharaelakh	Oktyabr'sky	11103	299.552	7.03296	5.73056	112.658	0.091168	0.126803	0.00244	0.0726895	14.652	0.104192	0.018356	0.599104	0.266992	17.2242	0.01014	0.01709	0.00387	0.166056	0.00783	0.892144	74.2368	1.34147
90OMZ67-5-1	Cu-rich massive sulfides	Kharaelakh	Oktyabr'sky	10256.4	46.5608	1.31542	1.23728	116.89	0.126984	0.0332006	0.00244	3.1905	3.28856	0.0367	0.005	1.92104	0.0474	16.8335	0.01014	0.01709	0.00387	0.0125	0.00783	0.247456	25.7224	1.43264
90OC13	Cu-rich massive sulfides	Kharaelakh	Oktyabr'sky	17191.7	5.33984	6.8376	0.149776	57.3056	0.02	0.134095	0.00244	50.3343	4.20024	0.104192	0.0192286	0.175824	0.0474	8.82376	0.01014	0.01709	0.00387	0.110704	0.00783	0.579568	58.2824	0.680504
90OC13	Cu-rich massive sulfides	Kharaelakh	Oktyabr'sky	17810.3	3.02808	1.26984	0.06528	62.5152	0.02	0.0875804	0.00244	96.4086	13.317	0.045584	0.0360635	0.29304	0.0474	11.5262	0.01014	0.01709	0.00387	0.104192	0.00783	0.0778184	27.676	0.625152
90OC13	Cu-rich massive sulfides	Kharaelakh	Oktyabr'sky	16898.6	60.5616	3.4188	0.143264	100.936	0.02	0.171362	0.00244	67.069	48.84	0.136752	0.144566	149.776	1.10704	4.2328	0.01014	0.01709	0.00387	0.0234432	0.06512	11.917	145.869	0.787952
90OC13	Cu-rich massive sulfides	Kharaelakh	Oktyabr'sky	17940.6	3.61416	0.1738	0.13024	46.5608	0.02	0.0419964	0.00244	51.1836	1.93406	0.0367	0.005	0.641432	0.0474	4.68864	0.01014	0.01709	0.00387	0.0125	0.00783	0.628408	21.9454	0.106471
90OC13	Cu-rich massive sulfides	Kharaelakh	Oktyabr'sky	17615	14.0008	0.280016	0.06528	52.7472	0.02	0.01965	0.00244	55.5149	4.00488	0.0367	0.005	0.0496255	0.0474	3.7444	0.01014	0.01709	0.00387	0.0125	0.00783	0.517704	7.19576	0.0771672
90OC13	Cu-rich massive sulfides	Kharaelakh	Oktyabr'sky	17777.8	8.72608	0.364672	0.136752	48.5144	0.0221408	0.137133	0.00244	54.8308	3.8258	0.0367	0.0162214	0.0496255	0.0474	5.17704	0.01014	0.01709	0.00387	0.0125	0.00783	0.170614	17.8429	0.172568
90OC13	Cu-rich massive sulfides	Kharaelakh	Oktyabr'sky	19145.3	42.328	3.0932	0.198616	59.2592	0.02	0.38166	0.00244	52.5158	7.06552	0.104192	0.0349134	0.250712	0.0474	7.42368	0.01014	0.01709	0.00387	0.0125	0.00783	2.02198	13.2845	0.1628
90OMZS1-3	Cu-rich massive sulfides	Kharaelakh	Oktyabr'sky	11500.2	102.238	0.901912	0.133496	52.8123	0.0196582	0.01965	0.00244	140.331	21.7826	0.084656	0.005	0.14652	0.0474	6.08872	0.01014	0.01709	0.00387	0.286528	0.00783	4.5584	167.033	0.312576
90OMZS1-3	Cu-rich massive sulfides	Kharaelakh	Oktyabr'sky	11461.1	188.848	0.9768	0.21164	46.2352	0.0286528	0.056573	0.00618877	123.075	9.6052	0.058608	0.005	0.312576	0.055352	3.97232	0.01014	0.01709	0.00387	0.074888	0.00783	4.42816	332.112	1.01913

## Sheet: Noril'sk I Contact Pn
Appendix 2 - Complete data set of LA-ICP-MS analyses of contact-pentlandite from the Noril'sk I intrusion obtained in this study.
Sample	Ore type	Intrusion	Co	Cu	Zn	Se	Ru	Rh	Pd	Ag	Cd	Sn	Sb	Te	Re	Os	Ir	Pt	Au	Pb	Bi
Isotope			59Co	65Cu	66Zn	82Se	101Ru	103Rh	108Pd	109Ag	111Cd	118Sn	121Sb	128Te	185Re	189Os	193Ir	195Pt	197Au	208Pb	209Bi
Limit of detection			0.00148234	0.159619		1.74868	0.0297721	0.0041882	0.0178193	0.0154553	0.131375	0.0608077	0.400154	0.67451	0.0046493	0.025842	0.0108036	0.0359853	0.0152305	0.0409262	0.555792
AB-1	Disseminated	Noril'sk I	2884.58	159.87	333.769	75.2136	7.4888	23.8877	199.893	17.4196	0.620683	0.0814	0.400154	9.38737	0.141294	0.605616	1.93406	3.97232	0.0169312	24.7782	1.53032
AB-1	Disseminated	Noril'sk I	3129.53	416.768	218.234	82.3768	8.07488	26.344	278.695	16.1498	0.465512	0.0608077	0.400154	11.7609	0.158421	0.774928	2.10989	14.3264	0.39072	18.3638	4.7212
AB-1	Disseminated	Noril'sk I	3569.75	726.088	26.3164	92.796	8.954	29.2199	363.693	14.359	0.0418961	0.110704	0.400154	13.8993	0.179829	0.771672	2.51363	18.5592	1.59544	10.6471	5.24216
AB-1	Disseminated	Noril'sk I	3651.97	602.36	6.80376	95.4008	11.4286	34.7639	342.205	17.7126	0.0170688	0.0608077	0.400154	10.2641	0.218364	1.13309	3.53927	10.0936	0.0152305	13.024	1.23728

## Sheet: Merensky Reef Contact Pn
Appendix 2 - Complete data set of LA-ICP-MS analyses of contact-pentlandite from the Merensky Reef of the Bushveld Complex obtained in this study.
Sample	Ore type	Intrusion	Mine	Co	Cu	Zn	As	Se	Mo	Ru	Rh	Pd	Ag	Cd	In	Sn	Sb	Te	Re	Os	Ir	Pt	Au	Tl	Pb	Bi
Isotope				59Co	65Cu	66Zn	75As	82Se	95Mo	101Ru	103Rh	108Pd	109Ag	111Cd	115In	118Sn	121Sb	130Te	185Re	189Os	193Ir	195Pt	197Au	205Tl	208Pb	209Bi
Limit of detection				0.00713907	0.186536	0.1738	0.06528	1.8244	0.01965	0.0146762	0.00244	0.00817003	0.006761	0.0367	0.005	0.0496255	0.0474	0.2566	0.01014	0.01709	0.00387	0.0125	0.00783	0.00404	0.00714	0.00421
IM-19	Disseminated	Bushveld Complex	Impala	9637.76	0.52096	2.96296	2.9304	169.312	0.01965	0.0146762	0.227905	33.2024	0.840048	0.26048	0.005	0.068376	0.0474	2.53968	0.0749287	0.045584	0.00387	0.0125	0.00783	1.85592	5.8608	0.703296
IM-19	Disseminated	Bushveld Complex	Impala	7000.4	1465.2	2.47456	1.4652	72.9344	0.01965	0.0146762	55.9941	216.849	0.647944	0.0367	0.0135319	0.13024	0.0474	0.256631	0.164843	1.05169	2.47456	0.0125	0.00783	5.2096	28.6528	0.175824
IM-19	Disseminated	Bushveld Complex	Impala	7553.92	1.49776	0.1738	1.3024	214.896	0.01965	9.46659	81.0744	242.566	0.657712	0.182336	0.0274767	0.055352	0.058608	1.1396	0.109182	2.63736	3.45136	0.0125	0.00783	1.88848	3.61416	0.0397232
IM-19	Disseminated	Bushveld Complex	Impala	7163.2	1.33496	0.1738	0.71632	185.592	0.094424	15.1146	55.0264	230.197	0.478632	0.06512	0.005	0.0496255	0.0474	0.58608	0.393911	5.79568	2.07082	0.042328	0.00783	0.0208384	0.6512	0.071632
IM-19	Disseminated	Bushveld Complex	Impala	6772.48	87.912	0.1738	1.1396	201.872	0.01965	5.53345	42.0022	224.663	0.332112	0.0367	0.0215834	0.0496255	0.0474	0.94424	0.192674	2.21408	1.56614	0.0125	0.00783	0.348392	1.04192	0.120472
IM-19	Disseminated	Bushveld Complex	Impala	8009.76	2.34432	0.521	2.05128	273.504	0.01965	3.14634	16.1497	195.684	0.273504	0.0367	0.005	0.058608	0.0474	2.442	0.0856328	0.71632	0.79772	0.0125	0.00783	2.14896	4.98168	0.058608
IM-19	Disseminated	Bushveld Complex	Impala	11103	4.2328	0.1738	1.00936	129.914	0.026048	0.0146762	0.205098	135.78	0.5698	0.0367	0.005	0.0496255	0.0474	0.39072	0.01014	0.01709	0.00387	0.0125	0.00783	2.31176	9.768	0.042328
IM-19	Disseminated	Bushveld Complex	Impala	6316.64	1269.84	0.1738	1.00936	195.36	0.01965	4.03405	16.9745	77.8198	0.628408	0.0367	0.0136843	0.087912	0.0474	0.84656	0.169125	2.01872	0.420024	0.0125	0.00783	0.42328	7.8144	0.055352
IM-21	Disseminated	Bushveld Complex	Impala	4395.6	5.14448	0.362	2.63736	70.3296	0.01965	0.0146762	14.652	160.849	0.657712	0.0367	0.005	0.0496255	0.0474	0.52096	0.145576	0.810744	0.931216	0.84656	0.00783	0.00404	100.936	0.04884
IM-21	Disseminated	Bushveld Complex	Impala	4525.84	586.08	0.1738	1.69312	144.241	0.074888	0.0146762	1.53736	162.799	1.04192	0.0367	0.005	0.074888	0.0474	0.2566	0.0449572	0.250712	0.706552	0.595848	0.00783	1.75824	9.768	0.061864
IM-21	Disseminated	Bushveld Complex	Impala	5177.04	651.2	1.92104	0.78144	73.26	0.01965	0.0146762	1.71117	149.447	1.39682	0.100936	0.005	0.06512	0.078144	0.2566	0.01014	0.0170919	0.856328	1.17216	0.00783	1.49776	13.024	0.039072
IM-21	Disseminated	Bushveld Complex	Impala	5339.84	20.5128	0.1738	1.07448	166.056	0.01965	6.69933	3.54888	146.507	1.33496	0.39072	0.005	0.104192	0.0474	0.2566	0.179829	2.57224	1.00936	0.921448	0.00783	2.2792	9.1168	0.068376
IM-21	Disseminated	Bushveld Complex	Impala	4949.12	15.6288	0.1738	1.20472	229.874	0.0814	22.5372	20.187	72.6096	1.0289	0.0367	0.005	0.0496255	0.0474	0.2566	0.175547	5.89336	12.3728	8.56328	0.00783	10.6797	53.0728	6.08872
IM-21	Disseminated	Bushveld Complex	Impala	6284.08	3.45136	0.1738	1.88848	240.944	0.035816	20.2553	15.2381	36.1463	0.892144	0.0367	0.005	0.0496255	0.0474	0.2566	0.158421	5.56776	4.36304	0.133496	0.00783	2.05128	21.164	0.107448
IM-21	Disseminated	Bushveld Complex	Impala	6349.2	4.68864	2.89784	1.85592	253.968	0.06512	14.6171	14.5542	56.9723	0.70004	0.22792	0.005	0.87912	0.078144	0.61864	0.0749287	5.24216	3.32112	0.156288	0.00783	1.88848	39.072	0.0299552
